# Supplementary material for: Lessons Learned From a New Reverse-Integration Model to Improve Primary Care Screening in Community Mental Health Settings
Source: Atypon-hosted journal article supplement (doi:10.1176/appi.ps.202100177), 2022-02-09
Supplement: appi.ps.202100177.ds001.pdf [file appi.ps.202100177.ds001.pdf]

## **ONLINE SUPPLEMENT**

- 1. eFigure: CRANIUM Intervention Details**
- 2. eBox: Clinical Vignette**
- 3. eAppendix: CRANIUM Tools**
  - a. Medication Algorithm
  - b. Interactions with Psychotropics
  - c. Urgent Care Referral Guidelines
  - d. Local Primary Care Clinics
  - e. CVD Risk Profiles of Antipsychotic Medications

**eFigure: CRANIUM intervention details**

| Patient-centered team                                                                                                                                                                                                                                                                                                                                                                                                                                                                                                                                                                                                                                                                                                                                                                                                                                                                                                                                       | Population-based care                                                                                                                                                                                                                                                                                                                                                                                                                                                                                                                             | Screening protocols                                                                                                                                                                                                                                                                                                                                                                                                                                                                                       | Treatment protocols                                                                                                                                                                                                                                                                                                                                                                                                                                                                                                                                                                        |
|-------------------------------------------------------------------------------------------------------------------------------------------------------------------------------------------------------------------------------------------------------------------------------------------------------------------------------------------------------------------------------------------------------------------------------------------------------------------------------------------------------------------------------------------------------------------------------------------------------------------------------------------------------------------------------------------------------------------------------------------------------------------------------------------------------------------------------------------------------------------------------------------------------------------------------------------------------------|---------------------------------------------------------------------------------------------------------------------------------------------------------------------------------------------------------------------------------------------------------------------------------------------------------------------------------------------------------------------------------------------------------------------------------------------------------------------------------------------------------------------------------------------------|-----------------------------------------------------------------------------------------------------------------------------------------------------------------------------------------------------------------------------------------------------------------------------------------------------------------------------------------------------------------------------------------------------------------------------------------------------------------------------------------------------------|--------------------------------------------------------------------------------------------------------------------------------------------------------------------------------------------------------------------------------------------------------------------------------------------------------------------------------------------------------------------------------------------------------------------------------------------------------------------------------------------------------------------------------------------------------------------------------------------|
| <p>Team member main roles &amp; responsibilities:</p> <p><u>Psychiatrist</u></p> <ul style="list-style-type: none"> <li>• Watch 1-hour on-line education video</li> <li>• Receive 1-pg algorithm for their own use</li> <li>• Review monthly registry</li> <li>• Attend quarterly panel meetings</li> <li>• Treat CVD risk factors per protocol</li> </ul> <p><u>Consulting primary care provider</u></p> <ul style="list-style-type: none"> <li>• Attend quarterly panel meetings</li> <li>• Clinical decision support via eReferral (1)</li> </ul> <p><u>Case manager</u></p> <ul style="list-style-type: none"> <li>• Review monthly registry</li> <li>• Attend quarterly panel meetings</li> <li>• Identify patients who would benefit from peer navigator assistance.</li> </ul> <p><u>Peer navigators</u></p> <ul style="list-style-type: none"> <li>• Distribute monthly registry with lab slips</li> <li>• Provide navigation as needed.</li> </ul> | <p><u>Registry</u></p> <ul style="list-style-type: none"> <li>• The psychiatrist and case manager will receive a registry with missing labs and flagged abnormalities monthly</li> </ul> <p><u>Panel management</u></p> <ul style="list-style-type: none"> <li>• The patient-centered team will attend quarterly panel management meetings.</li> <li>• Patients missing labs will be discussed for adherence to screening protocols.</li> <li>• Patients with CVD risk factors will be discussed for adherence to treatment protocols.</li> </ul> | <p>Use of a stepped-care approach to ensure all patients obtain screening:</p> <ul style="list-style-type: none"> <li>• <u>Step 1</u>: Registry with missing labs given to providers.</li> <li>• <u>Step 2</u>: Peer Navigator will assist patients to lab facility.</li> <li>• <u>Step 3</u>: Clinic Nurse draws labs on-site</li> </ul> <p><b>Stepped-care Approach to Obtain Cardiometabolic Screening Labs</b></p> 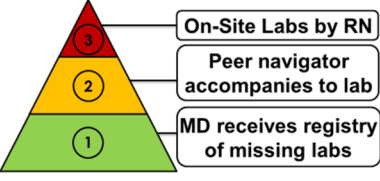 | <p>User-friendly medication algorithm for management of abnormalities (see <b>eAppendix</b>). This tool is helpful for patients with difficulty engaging in primary care (See <b>eBox1</b>).</p> <p><u>On-line education video</u> on treatment protocols</p> <p><u>Additional supports</u>: Hard copies and on-line access (see <b>eAppendix</b>):</p> <ul style="list-style-type: none"> <li>• Interactions with psychotropics</li> <li>• Urgent care referral guidelines</li> <li>• Local primary care clinics</li> <li>• CVD risk profiles of antipsychotic medications (2)</li> </ul> |

(1) Chen, A. H., Murphy, E. J., & Yee Jr, H. F. (2013). eReferral—a new model for integrated care. *The New England journal of medicine*, 368(26), 2450.

(2) Mangurian, C., Newcomer, J. W., Modlin, C., & Schillinger, D. (2016). Diabetes and cardiovascular care among people with severe mental illness: a literature review. *Journal of general internal medicine*, 31(9), 1083-1091.

**eBox: Clinical Vignette**

*Ms. Chen is a 54-year-old woman with schizophrenia and cocaine dependence prescribed risperidone. At a prior visit, psychiatrist noted elevated blood pressure and referred to primary care. Based on her delusions, however, she refused primary care. As part of CRANIUM, her psychiatrist checks her blood pressure at regular visits. Ms. Chen has a blood pressure reading of 160/90, and then the following month has a reading even higher (180/98). The psychiatrist checks the CRANIUM treatment algorithm posted by the blood pressure machine and notes that medication is indicated. Because Ms. Chen is unlikely to go to primary care, the psychiatrist talks to the patient about the importance of blood pressure control and, using the algorithm, he writes his first amlodipine prescription. He then emails the CRANIUM primary care eConsultant to discuss the decision. Upon return to the clinic for the next visit, the patient’s blood pressure was 145/80.*

## eAppendix: CRANIUM Tools

### 1. Medication Algorithm

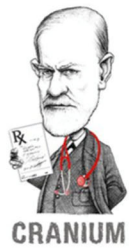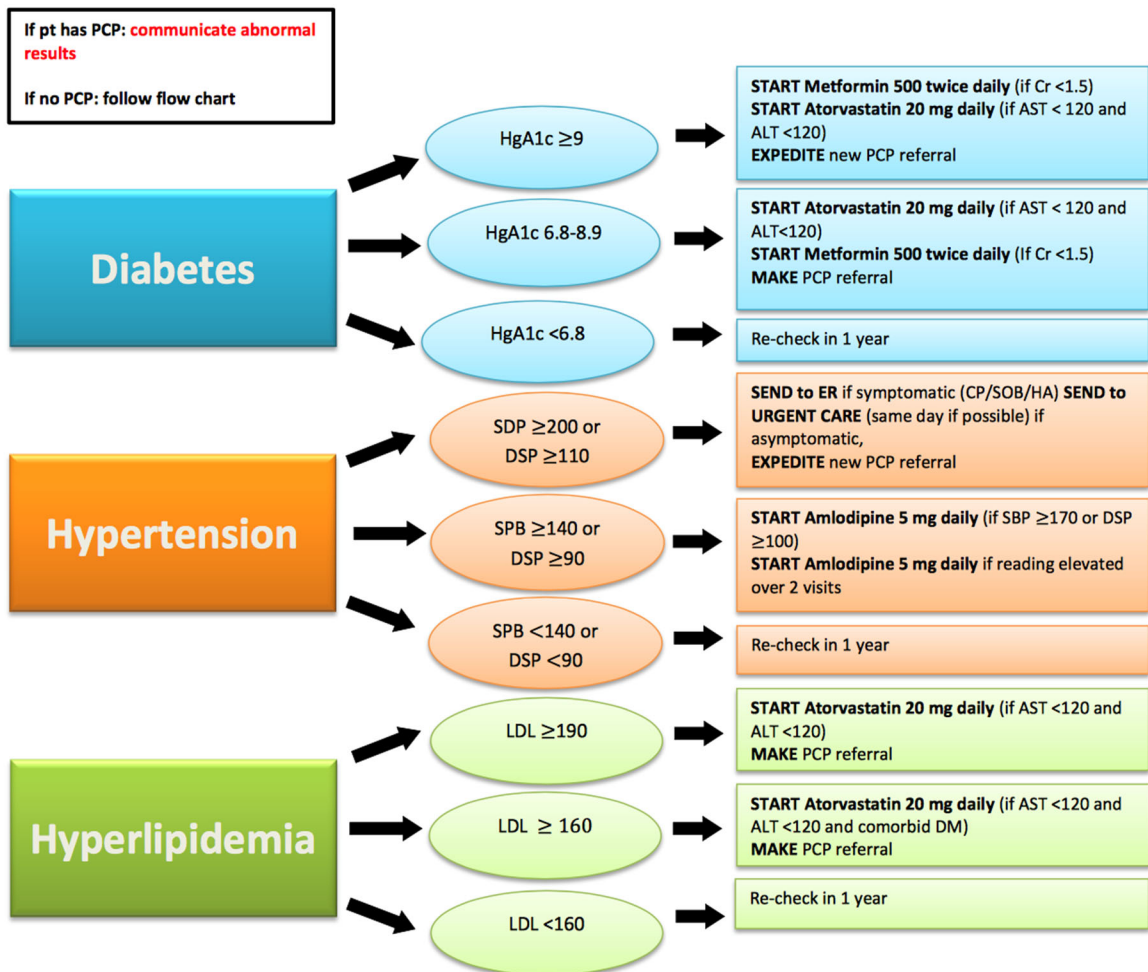

WEB: [cranium.ucsf.edu](http://cranium.ucsf.edu)  
E-MAIL: [cranium@ucsf.edu](mailto:cranium@ucsf.edu)

**REMEMBER: Advising and facilitate smoking cessation should be your number one medical priority**

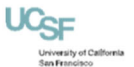

Available at:

<https://cranium.ucsf.edu/sites/cranium.ucsf.edu/files/CRANIUM%20Flow%20Chart%20for%20CRANIUM%20Metabolic%20Guidelinesv6.pdf>

## 2. Interactions with Psychotropics

### CRANIUM-Interactions with CPHS Formulary Psychiatric Drugs\* January 14, 2015

#### **No absolute contraindications with any of these medications**

#### **METFORMIN**

##### **Antidepressants**

- **Bupropion (Wellbutrin):** Metformin may increase serum concentration of bupropion
- **Fluoxetine (Prozac):** May increase risk of hypoglycemia with metformin

##### **Mood Stabilizers**

- **Lamotrigine (Lamictal):** Metformin may increase serum concentration of lamotrigine

##### **Other**

- **Atenolol (Tenormin) and Propranolol (Inderal):** May alter glucose metabolism, prolong hypoglycemia, mask hypoglycemic symptoms
  - **Levothyroxine (T4, Synthroid) & Liothyronine (T3, Cytomel):** May decrease hypoglycemic efficacy of metformin
  - **Nicotine replacement:** Nicotine may increase metformin levels and risk of lactic acidosis
- 

#### **AMLODIPINE (Norvasc)**

##### **Antipsychotics**

- **Aripiprazole (Abilify):** Amlodipine may increase the serum concentration of aripiprazole

##### **Antidepressants**

- **Duloxetine (Cymbalta) & Fluoxetine (Luvox):** Amlodipine may increase orthostatic hypotensive effect of these medications
- **MAO Inhibitors:** May increase the hypotensive efficacy of amlodipine.

##### **Mood Stabilizers**

- **Carbamazepine (Tegretol) & oxcarbazepine (Trileptal):** May decrease the hypotensive efficacy of amlodipine

##### **Other**

- **Methylphenidate (Ritalin):** May diminish the antihypertensive efficacy of amlodipine
- 

#### **ATORVOSTATIN (Lipitor)**

##### **Antipsychotics**

- **Aripiprazole (Abilify):** Atorvastatin may increase the serum concentration of Aripiprazole

##### **Antidepressants**

**Fluoxetine (Prozac), Fluvoxamine (Luvox), and Nefazodone (Serzone):** May increase statin level and increase risk of myopathy and rhabdomyolysis

##### **Mood Stabilizers**

- **Carbamazepine (Tegretol) & Oxcarbazepine (Trileptal):** May diminish antihyperlipidemic efficacy

##### **Other**

- **Atenolol (Tenormin) and Propranolol (Inderal):** May decrease antihyperlipidemic efficacy
- **Naloxegol (Movantic):** Atorvastatin may increase concentration of naloxegol.

\*Interactions between metformin, amlodipine, and atorvastatin were checked against all medication on the CBHS formulary (<http://www.sfdph.org/dph/files/CBHSdocs/DPHFormularyComparisonforPsychiatricMedicationsDec2013.pdf>) on Epocrates (<http://online.epocrates.com>, January 13, 2015) and Lexicomp (<http://online.lexi.com/crisql/servlet/crionline>, December 1, 2014)

Available at:

<https://cranium.ucsf.edu/sites/cranium.ucsf.edu/files/CRANIUM%20medication%20interactions.pdf>

### 3. Urgent Care Referral Guidelines

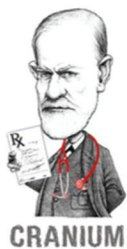

#### CRANIUM URGENT CARE PROCEDURE

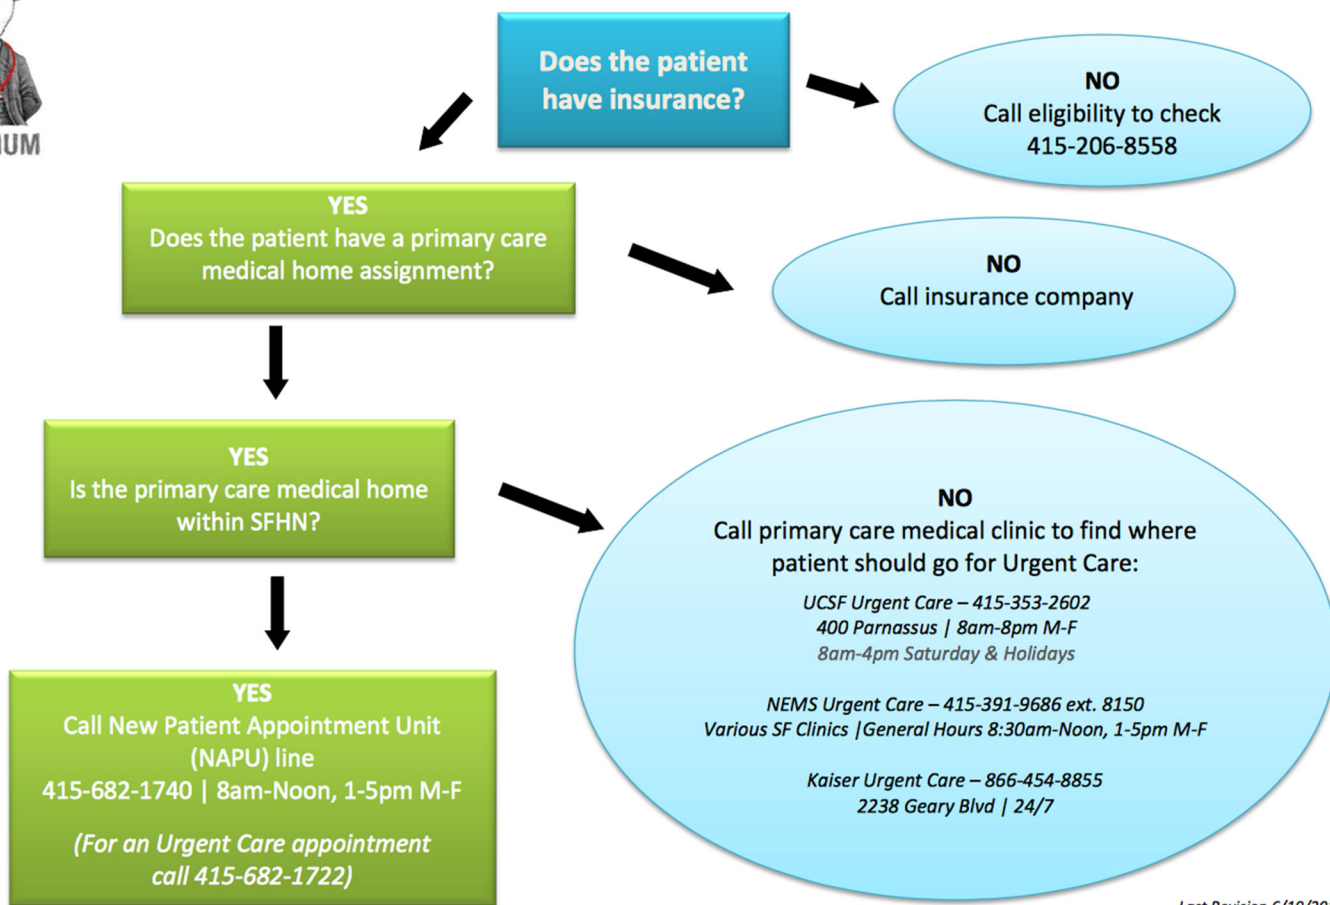

WEB: [cranium.ucsf.edu](http://cranium.ucsf.edu)  
E-MAIL: [cranium@ucsf.edu](mailto:cranium@ucsf.edu)

**If you have any concerns about sending a patient to Urgent Care, please contact the CRANIUM eConsultant  
Dr. Liz Goldman at [Lauren.Goldman@ucsf.edu](mailto:Lauren.Goldman@ucsf.edu)**

Last Revision 6/19/2015

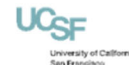

Available at:

[https://cranium.ucsf.edu/sites/cranium.ucsf.edu/files/CRANIUM%20Flow%20Chart%20for%20CRANIUM%20Urgent%20Care%20Guidelines\\_0.pdf](https://cranium.ucsf.edu/sites/cranium.ucsf.edu/files/CRANIUM%20Flow%20Chart%20for%20CRANIUM%20Urgent%20Care%20Guidelines_0.pdf)

4. Local Primary Care Clinics

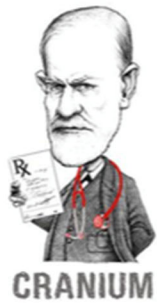

**CRANIUM Primary Care Medical Homes Guide**  
Date Prepared 11/4/14

| <b>SF Health Network Clinics</b>                                                                            | <b>Non SF Health Network Clinics</b>                                                                                                                             |
|-------------------------------------------------------------------------------------------------------------|------------------------------------------------------------------------------------------------------------------------------------------------------------------|
| <b><u>Chinatown Public Health Center</u></b><br>1490 Mason Street (at Broadway)<br>(415) 364-7600           | <b><u>Glide Health Services:</u></b><br>330 Ellis St (at Taylor)<br>(415) 674-6140                                                                               |
| <b><u>Curry Senior Center</u></b><br>333 Turk St (at Leavenworth)<br>(415) 885-2274                         | <b><u>Haight Ashbury Free Clinics</u></b><br>1735 Mission St (at 14 <sup>th</sup> St)**(Multiple Locations)<br>(415)-746-1950                                    |
| <b><u>Family Health Center at SFGH</u></b><br>995 Potrero Ave (at 22 <sup>nd</sup> St)<br>(415) 206-5252    | <b><u>Kaiser Permanente</u></b><br>New Patient Appointments: (415)-833-2200<br>2238 Geary Blvd (at Divisadero)                                                   |
| <b><u>General Medical Clinic at SFGH</u></b><br>1001 Potrero Ave (at 23 <sup>rd</sup> St)<br>(415) 206-8494 | <b><u>Lyon - Martin Women's Health Services</u></b><br>1748 Market St (at Valencia)<br>(415) 565-7667                                                            |
| <b><u>Maxine Hall Health Center</u></b><br>1301 Pierce Street (at Ellis)<br>(415) 292-1300                  | <b><u>Mission Neighborhood Health Center</u></b><br>240 Shotwell St (at 16 <sup>th</sup> St)**(Multiple Locations)<br>(415) 552-3870                             |
| <b><u>Ocean Park Health Center</u></b><br>1351 24th Avenue (at Judah & Irving)<br>(415)-682-1900            | <b><u>Native American Health Center</u></b><br>160 Capp St (at 17 <sup>th</sup> St)<br>(415) 621-8051                                                            |
| <b><u>Potrero Hill Health Center</u></b><br>1050 Wisconsin St (at Coral)<br>(415)-648-3022                  | <b><u>North East Medical Services</u></b><br>1520 Stockton St (at Columbus)**(Multiple Locations)<br>(415)-391-9686                                              |
| <b><u>Silver Avenue Family Health Center</u></b><br>1525 Silver Ave (at San Bruno)<br>(415)-657-1700        | <b><u>San Francisco Community Clinic Consortium</u></b><br>1550 Bryant St (at Alameda)<br>(415) 355-2222                                                         |
| <b><u>Southeast Health Center</u></b><br>2401 Keith St (at Armstrong)<br>(415)-671-7000                     | <b><u>San Francisco Free Clinic</u></b><br>4900 California St (at 11 <sup>th</sup> St)<br>(415) 750-9894                                                         |
| <b><u>Tom Waddell Health Center</u></b><br>230 Golden Gate Ave (at Leavenworth)<br>(415)-355-7500           | <b><u>South of Market Health Center</u></b><br>229 7th St (at Howard)<br>(415) 503-6000                                                                          |
| <b><u>Transgender Clinic</u></b><br>230 Golden Gate Ave (at Leavenworth)<br>(415) 355-7400                  | <b><u>St. Anthony Free Clinic</u></b><br>150 Golden Gate Avenue (at Leavenworth)<br>(415) 241-2600                                                               |
|                                                                                                             | <b><u>UCSF Center for Geriatric Care</u></b><br>New Patient Appointments: (844) 727-8273<br>3575 Geary Boulevard (at Arguello)<br>(415) 353-4900                 |
|                                                                                                             | <b><u>UCSF Family Medicine at Lakeshore</u></b><br>New Patient Appointments: (844) 727-8273<br>1569 Sloat Blvd (at Clairfield)<br>(415) 353-9339                 |
|                                                                                                             | <b><u>UCSF General Internal Medicine</u></b><br>New Patient Appointments: (844) 727-8273<br>1545 Divisadero St (at Post)<br>(415) 353-7900                       |
|                                                                                                             | <b><u>UCSF General Internal Medicine</u></b><br>New Patient Appointments: (844) 727-8273<br>1701 Divisadero St., Suite 500 (at Sutter)<br>(415) 353-7999         |
|                                                                                                             | <b><u>UCSF Primary Care at Laurel Village</u></b><br>New Patient Appointments: (844) 727-8273<br>3490 California Street, Suite 200 (at Laurel)<br>(415) 514-6200 |
|                                                                                                             | <b><u>UCSF Women's Health Primary Care</u></b><br>New Patient Appointments: (844) 727-8273<br>2356 Sutter St., 4th Floor (at Divisadero)<br>(415) 885-7788       |
|                                                                                                             | <b><u>Women's Community Clinic</u></b><br>1833 Fillmore Street (at Sutter)<br>(415) 379-7800                                                                     |

1. If the patient's medical home is assigned to a San Francisco Health Network clinic by their insurance, call the New Patient Assessment Unit (415-682-1740) to assist in expediting appointment.
2. If the patient's medical home is outside of San Francisco Health Network, please call assigned clinic directly.
3. If the patient has no assigned medical home or it is unknown, call their insurance.

WEB: [cranium.ucsf.edu](http://cranium.ucsf.edu)

E-MAIL: [cranium@ucsf.edu](mailto:cranium@ucsf.edu)

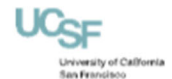

Available at:

<https://cranium.ucsf.edu/sites/cranium.ucsf.edu/files/CRANIUM%20San%20Francisco%20Primary%20Care%20Medical%20Homes%20Guide.pdf>

## 5. CVD Risk Profiles of Antipsychotic Medications

### Antipsychotic Medication Side Effects (1)

| Class                                         | Generic Name   | Trade Name | Metabolic abnormalities <sup>µ</sup> | EPS/TD <sup>¶</sup> | Hyperprolactinemia |
|-----------------------------------------------|----------------|------------|--------------------------------------|---------------------|--------------------|
| Second Generation Antipsychotics              | Aripiprazole   | Abilify    | +                                    | ++                  | +                  |
|                                               | Asenapine      | Saphris    | Unknown                              | Unknown             | Unknown            |
|                                               | Clozapine      | Clozaril   | ++++                                 | +                   | +                  |
|                                               | Iloperidone    | Fanapt     | Unknown                              | Unknown             | Unknown            |
|                                               | Lurasidone     | Latuda     | Unknown                              | Unknown             | Unknown            |
|                                               | Olanzapine†    | Zyprexa    | ++++                                 | ++                  | ++                 |
|                                               | Paliperidone†  | Invega     | +++                                  | +++                 | ++++               |
|                                               | Quetiapine†    | Seroquel   | +++                                  | +                   | +                  |
|                                               | Risperidone†   | Risperdal  | +++                                  | +++                 | ++++               |
|                                               | Ziprasidone    | Geodon     | +                                    | ++                  | ++                 |
| Commonly Used First Generation Antipsychotics | Chlorpromazine | Thorazine  | ++++                                 | ++                  | +++                |
|                                               | Fluphenazine†  | Prolixin   | ++                                   | ++++                | ++++               |
|                                               | Haloperidol†   | Haldol     | ++                                   | ++++                | ++++               |
|                                               | Perphenazine   | Trilafon   | +++                                  | +++                 | +++                |

+ = minimal risk    ++ = low risk    +++ = moderate risk    ++++ = high risk

† Long-acting injectables are assumed to have the same side effect profile as the oral preparations. However, some advantages for long-acting preparations due to more uniform serum concentrations may be possible.

<sup>µ</sup>Given the significant overlap in risk, weight gain, lipid abnormalities, and diabetes were combined into one category.

<sup>¶</sup>EPS = Extrapyramidal symptoms; TD = tardive dyskinesia.

Sources: The primary source for all ratings is The 2009 Schizophrenia PORT Psychopharmacologic Treatment Recommendations and Summary Statements (Buchanan 2009). Since no single source covers all of the side effects for all drugs, additional sources for specific side effects include: Weight/metabolic (Newcomer 2005, Allison 1999, Nasrallah 2009), EPS/TD (Sadock 2007, Miyamoto 2008, Nasrallah 2009), and Hyperprolactinemia (Bushe 2008). Expert consultation was used when sources conflicted.

(1) This table originally published in Mangurian, C., Newcomer, J. W., Modlin, C., & Schillinger, D. (2016). Diabetes and cardiovascular care among people with severe mental illness: a literature review. *Journal of general internal medicine*, 31(9), 1083-1091.

Available at:

<https://integration.ucsf.edu/tools-clinicians#3-Table-1-Antipsychotic-Medication-Side-Effects>
